# Supplementary material
Source: PubMed Central journal article supplement (PMC7805314)

## SUPPLEMENTAL DATA

**Supplemental Table 1: Characteristics of patients with complete molecular response after induction with CPX-351**

|                                             | n = 8 | % or range |
|---------------------------------------------|-------|------------|
| <b>Age, median (years)</b>                  | 67    | 31-70      |
| <b>Sex</b>                                  |       |            |
| Male                                        | 3     | 38         |
| Female                                      | 5     | 62         |
| <b>AML subtype</b>                          |       |            |
| MRC-AML                                     | 4     | 50         |
| MDS-AML                                     | 1     | 25         |
| CMML-AML                                    | 0     | 0          |
| t-AML                                       | 4     | 50         |
| <b>Median number of WBC (G/L)</b>           | 4     | 0-6        |
| <b>Hyperleukocytosis</b>                    | 0     | 0          |
| <b>Cytopenias</b>                           |       |            |
| 1                                           | 1     | 13         |
| 2                                           | 5     | 62         |
| 3                                           | 1     | 13         |
| <b>Karyotype</b>                            |       |            |
| Complex                                     | 4     | 50         |
| Monosomal                                   | 2     | 25         |
| <b>Prior HMA</b>                            | 0     | 0          |
| <b>2017 ELN genetic risk stratification</b> |       |            |
| Favorable                                   | 0     | 0          |

|              |   |    |
|--------------|---|----|
| Intermediate | 2 | 25 |
| Adverse      | 6 | 75 |

n = 6      % or range

---

**Median number of mutations**      2      2-7

**Lindsley's classifier**

|                              |   |    |
|------------------------------|---|----|
| de novo/pan-AML              | 0 | 0  |
| Secondary-type mutations AML | 4 | 67 |
| <i>TP53</i> mutated AML      | 2 | 33 |

**Functional group**

|                              |   |    |
|------------------------------|---|----|
| Epigenetic modifications     | 5 | 83 |
| Spliceosome complex          | 1 | 17 |
| Signaling and kinase pathway | 3 | 50 |
| Cohesin complex              | 1 | 17 |
| Transcription factors        | 1 | 17 |

---

**Supplemental Table 2: Comparison of different classifications of secondary AML**

|                              | Clinical classification |            |          | Lindsley's classifier |                                 |                            | 2017 ELN genetic risk stratification |            |              |            |          |
|------------------------------|-------------------------|------------|----------|-----------------------|---------------------------------|----------------------------|--------------------------------------|------------|--------------|------------|----------|
|                              | MRC-AML                 | t-AML      | <i>p</i> | de novo/<br>pan-AML   | Secondary-type<br>mutations AML | <i>TP53</i> mutated<br>AML | <i>p</i>                             | Favorable  | Intermediate | Adverse    | <i>p</i> |
|                              | n = 74                  | n = 27     | value    | n = 21                | n = 37                          | n = 22                     | value                                | n = 2      | n = 39       | n = 61     | value    |
| <b>Age – years</b>           |                         |            |          |                       |                                 |                            |                                      |            |              |            |          |
| Median (range)               | 67 (20-82)              | 65 (31-83) |          | 71 (34-83)            | 67 (20-82)                      | 63 (49-75)                 |                                      | 71 (68-73) | 70 (31-83)   | 66 (20-79) |          |
| <b>AML subtype – n (%)</b>   |                         |            |          |                       |                                 |                            |                                      |            |              |            |          |
| MRC-AML                      | 74 (100)                | -          |          | 13 (62)               | 32 (86)                         | 13 (59)                    |                                      | 1 (50)     | 31 (79)      | 41 (67)    |          |
| MDS-AML                      | 35 (47)                 | -          |          | 4 (31)                | 17 (53)                         | 8 (62)                     |                                      | -          | 13 (42)      | 21 (51)    |          |
| CMML-AML                     | 9 (12)                  | -          |          | 2 (15)                | 5 (16)                          | -                          |                                      | 1 (100)    | 7 (23)       | 1 ( )      |          |
| t-AML                        | -                       | 27 (100)   |          | 8 (38)                | 5 (14)                          | 8 (36)                     |                                      | 1 (50)     | 8 (21)       | 18 (30)    |          |
| Others*                      | -                       | -          |          | -                     | -                               | 1 (5)                      |                                      | -          | -            | 2 (3)      |          |
| <b>Number of WBC (G/L)</b>   |                         |            |          |                       |                                 |                            |                                      |            |              |            |          |
| Median (range)               | 3 (0-156)               | 4 (0-116)  |          | 3 (0-156)             | 4 (0-85)                        | 2 (0-14)                   |                                      | 44 (4-85)  | 3 (0-156)    | 3 (0-119)  |          |
| <b>Karyotype – n (%)</b>     |                         |            |          |                       |                                 |                            |                                      |            |              |            |          |
| Complex                      | 22 (30)                 | 11 (41)    |          | 4 (19)                | 3 (8)                           | 19 (86)                    |                                      | -          | -            | 35 (57)    |          |
| Monosomal                    | 19 (26)                 | 8 (30)     |          | 1 (5)                 | 6 (16)                          | 15 (68)                    |                                      | -          | -            | 28 (50)    |          |
| <b>2017 ELN risk – n (%)</b> |                         |            |          |                       |                                 |                            |                                      |            |              |            |          |

|              |            |            |            |            |             |           |             |             |
|--------------|------------|------------|------------|------------|-------------|-----------|-------------|-------------|
| Favorable    | 1/73 (1)   | 1/27 (4)   | 1/21 (5)   | 1/36 (3)   | -           | 2/2 (100) | -           | -           |
| Intermediate | 31/73 (43) | 8/27 (30)  | 13/21 (62) | 17/36 (47) | -           | -         | 39/39 (100) | -           |
| Adverse      | 41/73 (56) | 18/27 (66) | 7/21 (33)  | 18/36 (50) | 22/22 (100) | -         | -           | 61/61 (100) |

#### Mutation – n (%)

|                 |            |           |           |            |             |          |           |            |
|-----------------|------------|-----------|-----------|------------|-------------|----------|-----------|------------|
| <i>FLT3-ITD</i> | 5/70 (7)   | 4/26 (15) | 4/21 (19) | 4/37 (11)  | 1/22 (5)    | -        | 3/38 (8)  | 6/58 (10)  |
| <i>FLT3-TKD</i> | 2/71 (3)   | 4/27 (15) | 3/21 (14) | 2/37 (5)   | 1/22 (5)    | -        | 2/38 (5)  | 4/60 (7)   |
| <i>NPM1</i>     | 5/72 (7)   | 2/27 (7)  | 3/21 (14) | 3/37 (8)   | 1/22 (5)    | 1/2 (50) | 4/38 (11) | 2/61 (3)   |
| <i>IDH1</i>     | 5/70 (7)   | 2/26 (8)  | -         | 3/37 (8)   | 1/22 (5)    | -        | 2/38 (5)  | 5/57 (9)   |
| <i>IDH2</i>     | 2/70 (3)   | 1/26 (4)  | 1/21 (5)  | -          | -           | -        | 2/38 (5)  | 1/57 (2)   |
| <i>DNMT3A</i>   | 9/54 (17)  | 4/19 (21) | 3/21 (14) | 6/37 (16)  | 4/22 (18)   | -        | 3/38 (8)  | 10/41 (24) |
| <i>TET2</i>     | 13/54 (24) | 3/19 (16) | 3/21 (14) | 11/37 (30) | 3/22 (14)   | 1/2 (50) | 8/38 (21) | 8/41 (20)  |
| <i>RUNX1</i>    | 19/54 (35) | 3/19 (16) | 3/21 (14) | 19/37 (51) | -           | -        | -         | 14/41 (34) |
| <i>ASXL1</i>    | 14/54 (26) | 4/19 (21) | -         | 18/37 (49) | -           | -        | -         | 9/41 (22)  |
| <i>TP53</i>     | 13/54 (24) | 8/21 (38) | -         | -          | 22/22 (100) | -        | -         | 22/46 (48) |
| <i>EVI1</i>     | 3/63 (5)   | 3/23 (13) | -         | 3/37 (8)   | -           | -        | -         | 6/51 (12)  |

#### Number of mutations

|                |         |         |         |         |         |         |         |         |
|----------------|---------|---------|---------|---------|---------|---------|---------|---------|
| Median (range) | 3 (0-7) | 2 (0-7) | 1 (0-5) | 4 (2-7) | 2 (1-4) | 1 (3-5) | 2 (0-7) | 3 (0-7) |
|----------------|---------|---------|---------|---------|---------|---------|---------|---------|

#### Functional group

|                          |            |            |           |            |           |          |            |            |
|--------------------------|------------|------------|-----------|------------|-----------|----------|------------|------------|
| Epigenetic modifications | 31/54 (57) | 10/19 (53) | 6/21 (29) | 29/37 (78) | 7/22 (32) | 1/2 (50) | 18/30 (60) | 23/41 (56) |
|--------------------------|------------|------------|-----------|------------|-----------|----------|------------|------------|

|                                 |            |            |           |            |           |           |            |            |         |         |      |
|---------------------------------|------------|------------|-----------|------------|-----------|-----------|------------|------------|---------|---------|------|
| Spliceosome complex             | 22/54 (41) | 2/19 (11)  | -         | 23/37 (62) | 1/22 (5)  | 1/2 (50)  | 11/30 (37) | 11/41 (29) |         |         |      |
| Signaling/kinase pathway        | 19/54 (35) | 10/19 (53) | 9/21 (43) | 17/37 (46) | 3/22 (14) | 2/2 (100) | 12/30 (40) | 15/41 (37) |         |         |      |
| Cohesin complex                 | 10/54 (19) | 1/19 (5)   | 1/21 (5)  | 9/37 (24)  | 1/22 (5)  | -         | 5/30 (17)  | 6/41 (17)  |         |         |      |
| Transcription factors           | 23/54 (43) | 6/19 (32)  | 4/21 (19) | 25/37 (68) | -         | -         | 10/30 (33) | 18/41 (44) |         |         |      |
| <b>Overall response – n (%)</b> | 40 (54)    | 19 (70)    | 0.01      | 18 (86)    | 20 (54)   | 9 (41)    | 0.009      | 2 (100%)   | 25 (64) | 33 (54) | 0.26 |
| CR – n (%)                      | 37 (50)    | 19 (70)    |           | 16 (76)    | 20 (54)   | 9 (41)    |            | 2 (100%)   | 22 (56) | 32 (52) |      |
| CRi – n (%)                     | 3 (4)      | -          |           | 2 (10)     | -         | -         |            |            | 3 (8)   | 1 (2)   |      |

#### Overall survival

|                |             |                |      |             |             |                |      |             |             |             |      |
|----------------|-------------|----------------|------|-------------|-------------|----------------|------|-------------|-------------|-------------|------|
| Median (month) | Not reached | 9.4 (3.6-15.1) | 0.28 | not reached | not reached | 8.5 (6.1-10.9) | 0.02 | Not reached | Not reached | Not reached | 0.22 |
|----------------|-------------|----------------|------|-------------|-------------|----------------|------|-------------|-------------|-------------|------|

\*Two patients were treated post-myeloproliferative neoplasm AML: 1 with prior essential thrombocythemia (ET) and 1 with myelofibrosis secondary to ET.

**Supplemental Table 3: Univariate and multivariate analysis of factors influencing OS**

|                                   | Univariate analysis | Multivariate analysis |          |                 |
|-----------------------------------|---------------------|-----------------------|----------|-----------------|
|                                   | <i>p</i> -value     | Hazard ratio          | 95% CI   | <i>p</i> -value |
| <b><i>Monosomal karyotype</i></b> | 0.04                |                       | -        |                 |
| <b><i>DNMT3A</i> mutation</b>     | 0.02                |                       | -        |                 |
| <b><i>TP53</i> mutation</b>       | 0.02                |                       | -        |                 |
| <b>Spliceosome complex</b>        | 0.02                | 0.31                  | 0.1-0.96 | 0.04            |

**Supplemental Table 4: Characteristics and therapy response in patients with MRC-AML or t-AML (a comparison with a historical cohort)**

|                                      | CPX-351<br>n = 103 | IC<br>n = 233 | HMA<br>n = 120 | p value |
|--------------------------------------|--------------------|---------------|----------------|---------|
| <b>Age – years</b>                   |                    |               |                |         |
| Median (range)                       | 67 (20-83)         | 62 (19-78)    | 76 (52-93)     | <0.001  |
| <b>Sex – n (%)</b>                   |                    |               |                |         |
| Male                                 | 54 (52)            | 103 (44)      | 62 (52)        | 0.264   |
| Female                               | 49 (48)            | 130 (56)      | 58 (48)        |         |
| <b>AML subtype – n (%)</b>           |                    |               |                |         |
| MRC-AML                              | 74 (72)            | 178 (76)      | 93 (78)        | 0.113   |
| t-AML                                | 27 (26)            | 55 (24)       | 27 (22)        |         |
| Other                                | 2 (2)*             | 0             | 0              |         |
| <b>Number of WBC (G/L)</b>           |                    |               |                |         |
| Median (range)                       | 3 (0-156)          | 5.3 (0.5-352) | 2.5 (0.4-123)  | <0.001  |
| <b>Karyotype – n (%)</b>             |                    |               |                |         |
| Complex                              | 35/103 (34)        | 52/230 (23)   | 52/114 (46)    | <0.001  |
| Monosomal                            | 28/103 (27)        | 43/230 (19)   | 47/114 (41)    | <0.001  |
| <b>2017 ELN genetic risk – n (%)</b> |                    |               |                |         |
| Favorable                            | 2/102 (2)          | 31/223 (14)   | 2/100 (2)      | <0.001  |
| Intermediate                         | 38/102 (37)        | 80/223 (36)   | 17/100 (17)    |         |
| Adverse                              | 62/102 (61)        | 112/223 (50)  | 81/100 (81)    |         |
| <b>Mutation – n (%)</b>              |                    |               |                |         |
| <i>FLT3-ITD</i>                      | 9/98 (9)           | 21/180 (12)   | 2/54 (4)       | 0.274   |
| <i>FLT3-TKD</i>                      | 6/100 (6)          | 4/135 (3)     | 2/47 (4)       | 0.522   |

|               |            |             |            |        |
|---------------|------------|-------------|------------|--------|
| <i>NPM1</i>   | 7/101 (7)  | 27/183 (15) | 2/52 (4)   | 0.027  |
| <i>CEBPA</i>  | 6/90 (7)   | 5/147 (3)   | 1/34 (3)   | 0.447  |
| <i>IDH1</i>   | 7/98 (7)   | 10/167 (6)  | 6/76 (8)   | 0.845  |
| <i>IDH2</i>   | 3/98 (3)   | 21/168 (13) | 13/76 (17) | 0.008  |
| <i>DNMT3A</i> | 13/74 (18) | 23/124 (19) | 5/39 (13)  | 0.71   |
| <i>TET2</i>   | 17/74 (23) | 9/83 (11)   | 0/6 (0)    | 0.022  |
| <i>RUNX1</i>  | 22/74 (30) | 14/81 (17)  | 2/6 (33)   | 0.049  |
| <i>ASXL1</i>  | 18/74 (24) | 14/95 (15)  | 3/33 (9)   | 0.094  |
| <i>NRAS</i>   | 6/74 (8)   | 9/82 (11)   | 1/6 (17)   | 0.851  |
| <i>KRAS</i>   | 5/74 (7)   | 5/82 (6)    | 0/6 (0)    | 0.727  |
| <i>WT1</i>    | 7/74 (9)   | 5/84 (6)    | 2/7 (29)   | 0.104  |
| <i>KIT</i>    | 2/74 (3)   | 1/84 (1)    | 1/9 (11)   | 0.186  |
| <i>TP53</i>   | 22/76 (29) | 16/88 (18)  | 12/17 (71) | <0.001 |

#### Chemotherapy – n (%)

|                    |              |
|--------------------|--------------|
| Dau-AraC           | 55/233 (24)  |
| Ida-AraC           | 58/233 (25)  |
| Ida-AraC-Lomustine | 119/233 (51) |
| Other              | 1/233 (<1)   |

#### Number of cycles

|                |          |
|----------------|----------|
| Median (range) | 5 (1-41) |
|----------------|----------|

#### Overall response (CR-CRi) – n

|             |             |              |             |        |
|-------------|-------------|--------------|-------------|--------|
| (%)         | 61/103 (59) | 160/218 (73) | 19/101 (19) | <0.001 |
| CR – n (%)  | 57/103 (55) | 120/218 (55) | 11/101 (11) |        |
| CRi – n (%) | 4/103 (4)   | 40/218 (18)  | 8/8         |        |

|                     |             |             |           |        |
|---------------------|-------------|-------------|-----------|--------|
| <b>ASCT – n (%)</b> | 36/103 (35) | 93/218 (43) | 2/111 (2) | <0.001 |
|---------------------|-------------|-------------|-----------|--------|



\*Two patients were treated post-myeloproliferative neoplasm AML: 1 with prior essential thrombocythemia (ET) and 1 with myelofibrosis secondary to ET.

# Supplemental Figure 1: Frequencies of mutated genes by different classifications

74 patients treated with CPX-351 were assessed by NGS and classified according to AML subtypes (A), Lindsley’s molecular classes (B) and 2017 ELN genetic risk stratification (C).

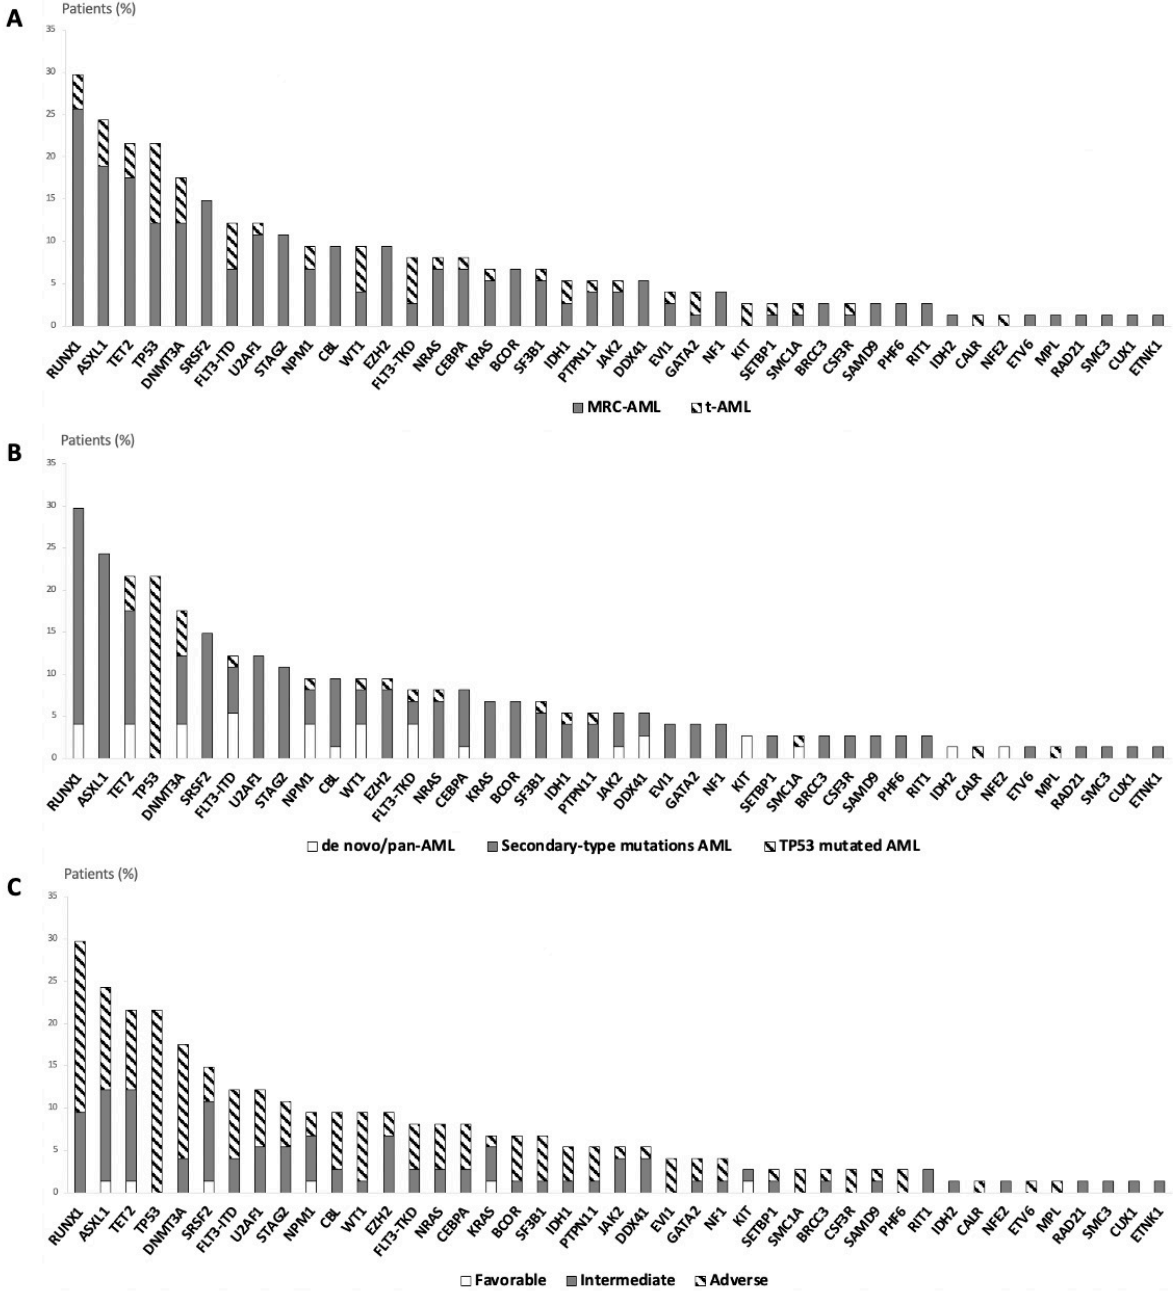

## Supplemental Figure 2: Median overall survival in patients treated by CPX-351 (n=103), intensive chemotherapy (n=233) or azacitidine (n=120) according to age and 2017 ELN genetic risk stratification

All patients

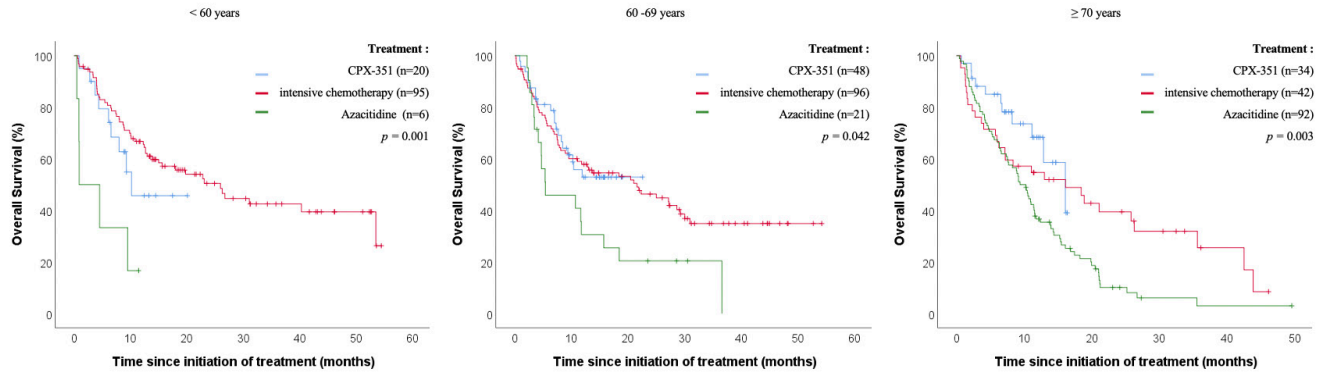

Patients with intermediate 2017 ELN risk

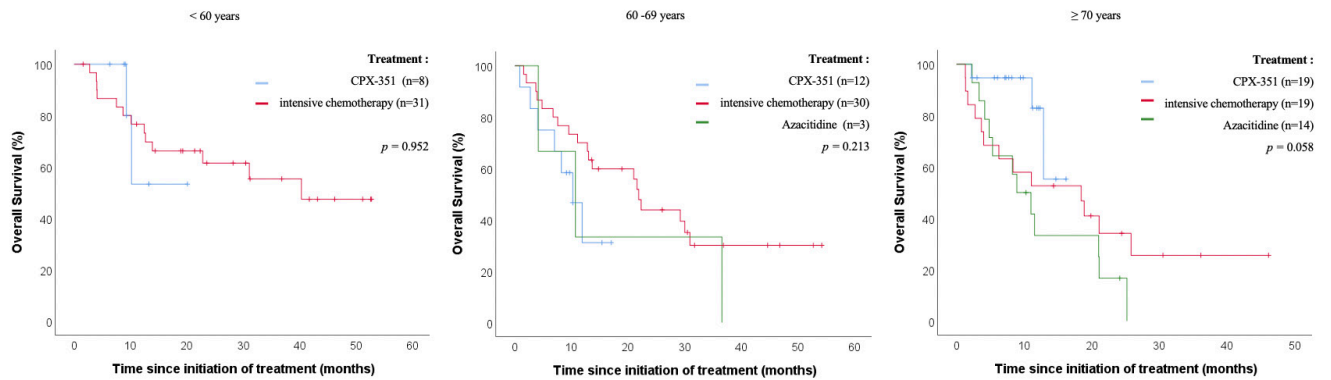

Patients with adverse 2017 ELN risk

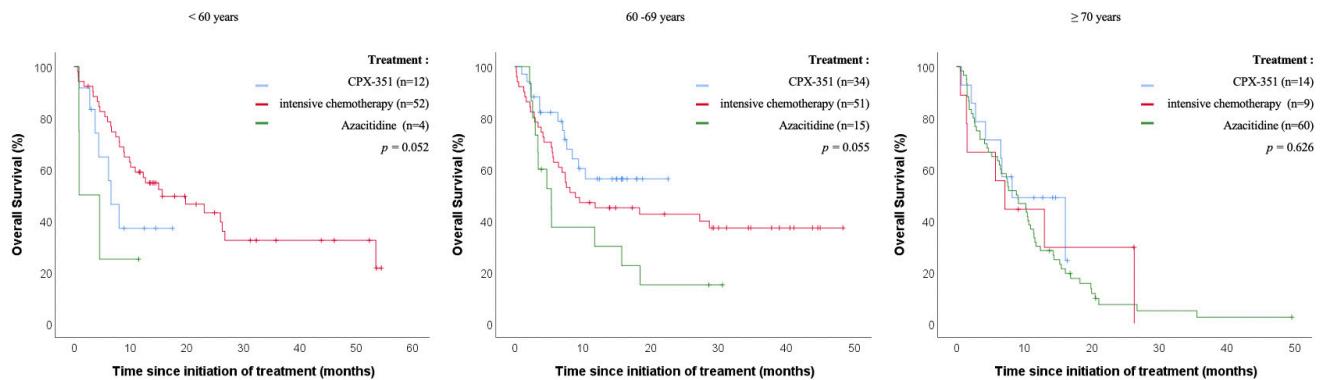

Supplement: advancesADV2020003159-suppl1.pdf [file advancesADV2020003159-suppl1.pdf]
